# Supplementary material for: Geospatial dataset for Hydrologic analyses in India (GHI): A quality controlled dataset on river gauges, catchment boundaries and hydrometeorological time series
Source: Copernicus journal article supplement (doi:10.5194/essd-2023-46), 2023-06-13
Supplement: Supplementary file [file essd-2023-46-AC1-supplement.pdf]

## Response to Reviewer #2's comments:

[only select comments from Reviewer #2 involving edits to the manuscript are shown below]

The author would like to thank the reviewer for the positive feedback and the suggestions made to improve the readability of the manuscript. The author agrees with all of the comments, and revisions were made accordingly. Please see below the specific responses to the individual comments.

Title: correct (don't capitalise) "Geospatial dataset for hydrologic analyses in India (GHI): A quality controlled dataset on river gauges, catchment boundaries and hydrometeorological time series"

The title has been revised accordingly.

Figures The following Figures have bad quality and should be replaced with high resolution images:

1. A5. (a) Kishan Nagar station<...>; (b) Jannapura station;
2. Figure A3.
3. Figure 6. Example illustrating GHI's boundary delineation process;
4. Figure 5. Example showing GHI site verification and landmark identification;
5. Figure 3. (a) Erroneous station location from CWC

Other Figures are acceptable.

In the original manuscript screenshots from Google Maps and OpenStreetMap were used within several figures to provide spatial reference. The displayed screenshots turned out to be blurry in print. In the revised manuscript, such screenshots were replaced with high resolution original graphics (original tiles from the above map vendors). Figures 3, 5, 6, and figures A3 and A5 in the appendix were revised and the author made sure that the printed version of these figures are not blurry.
